# Supplementary material for: Detection of Circulating Tumor Cells in the Diagnostic Leukapheresis Product of Non-Small-Cell Lung Cancer Patients Comparing CellSearch® and ISET
Source: PubMed Central journal article supplement (PMC7226321; doi:10.3390/cancers12040896), 2020-04-07
Supplement: cancers-12-00896-s001.pdf [file cancers-12-00896-s001.pdf]

## Supplementary Materials

## Detection of Circulating Tumor Cells in the Diagnostic Leukapheresis Product of Non-Small Cell Lung Cancer Patients Comparing CellSearch® and ISET®

Menno Tamminga, Kiki C. Andree, T.Jeroen N. Hiltermann, Maximilien Jayat, E. Schuurin, Hilda van den Bos, Diana C.J. Spierings, Peter M. Lansdorp, Wim Timens, Leon W.M.M. Terstappen and Harry J.M. Groen

Table S1. Blood cell counts in peripheral blood and DLA product.

| Cell counts     |                    | Peripheral Blood |     | DLA Product |      |
|-----------------|--------------------|------------------|-----|-------------|------|
| Blood cells     | Unit               | Mean             | SD  | Mean        | SD   |
| Red blood cells | $\times 10^{12}/L$ | 4.5              | 0.6 | 0.6         | 0.28 |
| Leukocytes      | $\times 10^9/L$    | 10.1             | 3.8 | 135         | 76   |
| Lymphocytes     | $\times 10^9/L$    | 1.7              | 0.8 | 51.8        | 22   |
| Monocytes       | $\times 10^9/L$    | 0.9              | 0.4 | 29          | 10   |
| Granulocytes    | $\times 10^9/L$    | 7.4              | 3.3 | 62          | 30   |
| Platelets       | $\times 10^9/L$    | 298              | 127 | 1540        | 377  |
| Hemoglobin      | Mmol/L             | 8.2              | 1.3 | 0.91        | 0.28 |
| Hematocrit      | %                  | 41               | 5.6 | 0.07        | 0.04 |

Table S2. Mean cell counts (pre and post apheresis) in blood and in diagnostic leukapheresis product.

| Blood cells     | Unit             | Blood Pre DLA | DLA  | Blood Post DLA |
|-----------------|------------------|---------------|------|----------------|
| Red blood cells | $\times 10^{12}$ | 4.6           | 0.5  | 4.2            |
| Leukocytes      | $\times 10^9$    | 10.1          | 133  | 8.5            |
| Lymphocytes     | $\times 10^9$    | 1.7           | 47   | 1.3            |
| Monocytes       | $\times 10^9$    | 0.9           | 31   | 0.6            |
| Granulocytes    | $\times 10^9$    | 7.3           | 69   | 6              |
| Platelets       | $\times 10^9$    | 281           | 2375 | 238            |
| Hemoglobin      | Mmol/L           | 8.1           | 0.9  | 7.4            |
| Hematocrit      | %                | 40.4          | 4    | 37.1           |

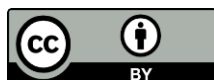

© 2020 by the authors. Licensee MDPI, Basel, Switzerland. This article is an open access article distributed under the terms and conditions of the Creative Commons Attribution (CC BY) license (<http://creativecommons.org/licenses/by/4.0/>).
